# Supplementary material
Source: MDPI journal article supplement (https://www.mdpi.com/1424-2818/4/2/196)
Supplement: s1 [file s1]

## Sheet: Sheet1
Supplementary Data: Habitat attributes of study plots and total number of mat collections. CG = Campground
Ecotype	Plot	Plot Type	Bulk Density (g cm–3)	Total Soil C (%)	Soil δ13C (‰)	Total Soil N (%)	Soil δ15N (‰)	C:N Ratio	Mineral Soil pH	CWD (Mg ha–1)	FWD (Mg ha–1)	Litter (Mg ha–1)	Age (yrs)	Elevation (m)	# Mats Collected
MH/NF	ABC	Control	0.649	3.52594	-24.1965	0.116307	3.49898	31.243	4.73333	68.1	8.9	107	300	1950	6
MH/NF	ABD	Abandoned CG	0.891	1.53066	-24.1774	0.0468526	2.23803	32.9722	5.1	43.5	3.8	42.1	300	1950	2
MH/NF	ASD	Abandoned CG	0.805	3.97162	-24.8867	0.13972	1.8003	28.5094	4.96667	18.9	5.8	62.4	300	2030	3
MH/NF	CSC	Control	0.619	4.93914	-25.2746	0.166343	3.14981	30.4841	4.66667	22.8	8.2	88.8	135	1770	2
MH/NF	CSD	Abandoned CG	0.738	3.3158	-25.268	0.117119	2.94084	28.6923	4.93333	14.4	4.9	72.6	135	1770	3
MH/NF	MCC	Control	0.868	2.03142	-25.0287	0.0487363	3.10866	42.063	5.13333	25.4	8.3	111	300	1890	13
MH/NF	MCD	Active CG	1.063	1.91701	-25.0859	0.0496157	1.55507	38.8133	5.36667	10.3	4.8	64	300	1890	5
MH/NF	MVEC	Control	0.606	4.97308	-25.6299	0.173643	1.60581	28.9376	4.83333	18.1	5.1	74	100	1890	8
MH/NF	MVED	Active CG	0.842	5.30301	-25.2625	0.211097	1.51383	25.2223	4.66667	2	0.33	38	100	1830	0
MH/NF	MVLC	Control	0.612	3.36429	-25.1343	0.103625	4.23245	32.1234	4.73333	20.5	10	157	300	1890	9
MH/NF	MVLD	Active CG	0.935	2.70205	-25.065	0.103837	1.62666	25.8206	5.13333	3.9	0.9	55	300	1830	5
MH/NF	PHC	Control	0.651	7.87527	-23.8555	0.389363	0.767852	20.3568	4.36667	63	4.1	66	300	2160	5
MH/NF	PHD	Active CG	0.997	5.07223	-23.97	0.239835	1.66374	21.2082	4.93333	26	3.4	27	300	2190	0
MH/NF	BFC	Control	0.694	2.45235	-25.4805	0.0597282	4.01738	41.3597	4.83333	54.5	6.52	109.8	225	1650	5
MH/NF	BFD	Wildfire	0.821	2.35102	-25.0621	0.119035	2.40279	20.114	5.76667	31.3	0.96	1.2	1	1650	0
MH/NF	FFC	Control	0.828	3.72722	-24.6467	0.116632	2.03695	33.1459	5.06667	24.6	6.6	81	300	2090	5
MH/NF	FFD	Wildfire	1.08	2.25576	-24.2783	0.108103	2.30114	21.0389	5.96667	29.2	8.58	0.6	8	2090	0
MH/NF	GFD	Wildfire	1.036	4.01717	-25.3544	0.135994	2.12852	29.6953	5.6	120.9	4.08	3.5	24	2010	3
PP/WF	A	Spring Rx Burn	0.662	2.96	-26.03	0.0987	2.41	29.3	5.89	95.75	37.63	68.27	~200	1550	10
PP/WF	B	Fall Rx Burn	0.684	2.49	-25.76	0.1	3.18	24.3	5.83	36.03	24.59	29.18	~200	1560	1
PP/WF	C	Spring Rx Burn	0.686	3.17	-25.56	0.1122	2.89	28.56	5.59	106.38	49.99	89.49	~200	1560	15
PP/WF	D	Unburned Control	0.556	4.82	-25.77	0.1406	2.63	26.56	5.63	97.4	47.82	87.43	~200	1540	8
PP/WF	E	Spring Rx Burn	0.751	2.36	-24.95	0.0907	2.51	26.2	5.73	71.03	47.64	68.53	~200	1540	9
PP/WF	F	Unburned Control	0.797	5.28	-26.41	0.0828	2.53	34.9	5.93	146.17	47.9	104.21	~200	1540	8
PP/WF	G	Unburned Control	0.874	4.09	-25.32	0.1806	3.1	23.19	5.69	123.67	59.55	107.44	~200	1530	6
PP/WF	H	Fall Rx Burn	0.767	2.36	-25.92	0.0854	1.54	27.33	6.07	60.39	30.22	33.83	~200	1530	2
PP/WF	I	Unburned Control	0.738	3.1	-26.15	0.1104	1.01	28.05	5.63	125.55	46.59	95.37	~200	1530	5
PP/WF	J	Fall Rx Burn	0.81	1.63	-25.86	0.0666	1.53	25.14	6.23	14.67	32.76	33.17	~200	1515	3
PP/WF	K	Spring Rx Burn	0.764	2.58	-25.47	0.0958	2.42	27.47	5.91	46.23	37.48	57.72	~200	1515	8
PP/WF	L	Fall Rx Burn	1.042	3.33	-25.31	0.1795	1.84	18.59	6.2	47.39	39.71	40.1	~200	1520	1
PP/WF	M	Fall Rx Burn	0.991	2.83	-24.88	0.148	2.59	19.7	6.49	46.14	33.45	30.71	~200	1500	0
PP/WF	N	Unburned Control	0.688	4.44	-25.45	0.22	1.45	20.68	6.07	145.63	62.02	140.82	~200	1500	5
PP/WF	O	Spring Rx Burn	0.963	2.87	-25.52	0.0987	2.11	29.1	5.93	84.86	38.06	60.33	~200	1500	8
PP/WF	P	Unburned Control	0.862	2.06	-25.3	0.0685	2.43	30.7	5.55	127.63	59.01	86.23	~200	1490	8
PP/WF	Q	Fall Rx Burn	0.877	2.34	-25.05	0.1012	2.34	23.06	6.37	54.45	23.4	21.73	~200	1490	1
PP/WF	R	Fall Rx Burn	0.993	3.33	-24.82	0.1837	1.86	18.57	6.1	17.7	35.84	36.89	~200	1490	0
PP/WF	S	Unburned Control	1.029	3.46	-25.42	0.1603	1.92	22.09	5.74	115.98	46.14	104.46	~200	1470	14
PP/WF	T	Spring Rx Burn	0.945	2.95	-25.12	0.1305	2.78	22.39	5.91	82.88	29.05	54.34	~200	1470	6
PP/WF	U	Unburned Control	0.687	1.84	-25.95	0.0784	3.04	24.66	5.97	97.06	58.87	98.95	~200	1540	13
PP/WF	V	Spring Rx Burn	0.642	3.03	-26.65	0.104	2.69	33.06	6.7	121.31	39.43	75.73	~200	1530	11
PP/WF	W	Spring Rx Burn	0.669	2.71	-25.63	0.09	2.45	29.18	5.53	98.27	42.07	61.4	~200	1520	7
PP/WF	X	Fall Rx Burn	0.762	2.27	-25.66	0.1049	1.66	22.5	6.69	11.71	27.02	30.24	~200	1510	1
